# Supplementary material for: Effect of hydrogen bonds on polarizability of a water molecule in (H2O)N (N = 6, 10, 20) isomers
Source: Royal Society of Chemistry journal article supplement (doi:10.1039/c001007c), 2010-01-01
Supplement: c001007c.pdf [file c001007c.pdf]

Table 1S Intramolecular harmonic vibrational frequency ranges of water clusters calculated with B3LYP/6-311G(d,p)<sup>a</sup>

| $W_N$ | $\nu_2$                | $\nu_1$                | $\nu_3$                | $\nu_{\max}(\text{intensity})$ |
|-------|------------------------|------------------------|------------------------|--------------------------------|
| 6A    | 1655-1730              | 3094-3654              | 3681-3880              | 3094( 826)                     |
|       | 1662-1727 <sup>b</sup> | 3358-3772 <sup>b</sup> | 3822-3962 <sup>b</sup> |                                |
|       | 1649-1708 <sup>c</sup> | 3205-3674 <sup>c</sup> | 3714-3888 <sup>c</sup> |                                |
| 6B    | 1652-1723              | 3249-3444              | 3876-3877              | 3346(2908)                     |
|       | 1674-1733 <sup>b</sup> | 3462-3605 <sup>b</sup> | 3953-3955 <sup>b</sup> |                                |
|       | 1643-1701 <sup>c</sup> | 3303-3459 <sup>c</sup> | 3880-3882 <sup>c</sup> |                                |
|       | 1767-1795 <sup>d</sup> | 3920-3986 <sup>d</sup> | 4203-4203 <sup>d</sup> |                                |
| 6C    | 1647-1747              | 3085-3686              | 3696-3882              | 3085( 925)                     |
|       | 1659-1754 <sup>b</sup> | 3346-3788 <sup>b</sup> | 3844-3950 <sup>b</sup> |                                |
|       | 1644-1718 <sup>c</sup> | 3183-3684 <sup>c</sup> | 3736-3881 <sup>c</sup> |                                |
| 10A   | 1659-1752              | 2973-3601              | 3616-3881              | 3159(3322)                     |
|       | 1612 <sup>e</sup>      | 3452 <sup>e</sup>      | 3713 <sup>e</sup>      |                                |
| 10B   | 1658-1751              | 3051-3579              | 3586-3879              | 3491(1967)                     |
| 10C   | 1660-1761              | 3078-3595              | 3610-3879              | 3191(4420)                     |
| 10D   | 1628-1749              | 3093-3682              | 3715-3876              | 3200(4442)                     |
| 20A   | 1658-1761              | 3145-3591              | 3615-3870              | 3480(2540)                     |
| 20B   | 1545-1768              | 3168-3536              | 3596-3876              | 3364(2648)                     |
| 20C   | 1659-1776              | 3008-3597              | 3620-3876              | 3393(3396)                     |
| 20D   | 1680-1741              | 3087-3435              | 3700-3849              | 3337(3827)                     |

<sup>a</sup> Frequencies are in  $\text{cm}^{-1}$ . <sup>b</sup> MP2/6-311+G\*\*, ref.[1]. <sup>c</sup> B3LYP/TZ2P(f)++, ref. [1]. <sup>d</sup> HF/aug-cc-pVDZ, ref.[2]. <sup>e</sup> HF/6-31G(d,p) with scaling factor of 0.8929, ref. [3].

The bending bands ( $\nu_2$ ) do not shift significantly compared to the water monomer but are broadened to higher frequencies by about  $5\text{-}150\text{cm}^{-1}$  except 20B of which the bending band has wider range than the others and broadens to both lower and higher frequencies. The frequencies with maximum IR intensity for all the clusters are located in the symmetric stretching band ( $\nu_1$ ). Significant red shifts are found for all the clusters compared to the  $\nu_1$  of water monomer. The gaps between  $\nu_1$  and  $\nu_3$  (asymmetric stretching) bands are very small. Both  $\nu_1$  and  $\nu_2$  bands are broadened but move to lower frequencies. Table 2 also lists the frequencies computed by other authors.<sup>1,2,3</sup>

#### References:

- [1] J. Kim, K.S. Kim, *J. Chem. Phys.* 1998, **109**, 5886.  
 [2] S.S. Xantheas, T.H. Dunning, Jr. *J. Chem. Phys.* 1993, **99**, 8774.  
 [3] S. Maheshwary, N. Patel, N. Sathyamurthy, A.D. Kulkarni, S.R. Gadre, *J. Phys. Chem. A* 2001, **105**, 10525.
